# Supplementary material for: Stem cell properties of human clonal salivary gland stem cells are enhanced by three-dimensional priming culture in nanofibrous microwells
Source: PubMed Central journal article supplement (PMC5863805; doi:10.1186/s13287-018-0829-x), 2018-03-22
Supplement: 13287_2018_829_MOESM1_ESM.pdf [file 13287_2018_829_MOESM1_ESM.pdf]

**Stem Cell Properties of Human Clonal Salivary Gland Stem Cells Are Enhanced by  
Three-dimensional Priming Culture in Nanofibrous Microwells**

Running Title: Three-dimensional Priming Culture of Salivary Gland Stem Cells

Hyun-Soo Shin<sup>1</sup>, Songyi Lee<sup>1</sup>, Hye Jin Hong<sup>2</sup>, Won-Gun Koh<sup>2</sup>, Young Chang Lim<sup>3</sup>,  
Jae-Yol Lim<sup>1,\*</sup>

<sup>1</sup>Department of Otorhinolaryngology, Yonsei University College of Medicine;

<sup>2</sup>Department of Chemical and Biomolecular Engineering, Yonsei University;

<sup>3</sup>Department of Otorhinolaryngology, Head and Neck Surgery, Konkuk University School of  
Medicine; Seoul, Republic of Korea

**\*Corresponding author:** Jae-Yol Lim, MD, PhD, Department of Otorhinolaryngology,  
Gangnam Severance Hospital, Yonsei University College of Medicine, 211 Eonju-ro,  
Gangnam-gu, Seoul 06273, Republic of Korea

E-mail: jylimmd@yuhs.ac Tel: 82-2-2019-3460, Fax: 82-2-3463-4750

**Table S1. Primers used for RT-PCR.**

| <b>Gene and symbol</b> |   | <b>Primer sequences (5'-3')</b> |
|------------------------|---|---------------------------------|
| <i>AMY1A</i>           | F | AATTGATCTGGGTGGTGAGC            |
|                        | R | CTTATTTGGCGCCATCGATG            |
| <i>AQP5</i>            | F | ACTGGGTTTTCTGGGTAGGG            |
|                        | R | GTGGTCAGCTCCATGGTCTT            |
| <i>CDH1</i>            | F | CGCATTGCCACATACTCT              |
|                        | R | TTGGCTGAGGATGGTGTA AG           |
| <i>TJP</i>             | F | TTTGGCCGAGGGATAGAAGT            |
|                        | R | TATTGCCATCTCTTGCTGCC            |
| <i>POU5F1</i>          | F | AAGCGATCAAGCAGCGACTA            |
|                        | R | GAAGTGAGGGCTCCCATAGC            |
| <i>NANOG</i>           | F | CAGAAAAACAACCTGGCCGAA           |
|                        | R | GGCCTGATTGTTCCAGGATT            |
| <i>LGR5</i>            | F | AGGATCTGGTGAGCCTGAGAA           |
|                        | R | CATAAGTGATGCTGGAGCTGGTAA        |
| <i>ITGB1</i>           | F | ATGGGCAGAGCAATGGTGGCCA          |
|                        | R | AGAGTGAGACC ACGAAGAGACT         |
| <i>THY1</i>            | F | GACAGCCTGAGAGGGTCTTG            |
|                        | R | CCCAGTGAAGATGCAGGTTT            |
| <i>SOX2</i>            | F | CAACATGATGGAGACGGAGC            |
|                        | R | GTGCATCTTGGGGTTCTCCT            |
| <i>CTNNB1</i>          | F | GTGTGGAGACAGGGGCTTTT            |
|                        | R | GGTGCGCAATACATCTCCAG            |
| <i>AXIN2</i>           | F | CAAGGCCAGCACATAGGAGA            |
|                        | R | GCAACGCGAGTCTGTGTTTT            |
| <i>WNT3A</i>           | F | GGCCCCACTCGGATACTTCT            |
|                        | R | AGGGAGGAATACTGTGGCCC            |
| <i>WNT9A</i>           | F | AAGGTGATCAAGGCTGGGGT            |
|                        | R | CTCATGGAAAGGCGCCAAC             |
| <i>ACTB</i>            | F | AGCTGTGCTATGTTGCCCTG            |
|                        | R | AGGAAGCAAGGCTGGAAGAG            |
| <i>GAPDH</i>           | F | ATGGGGAAGGTGAAGGTCG             |
|                        | R | TAAAAGCAGCCCTGGTGACC            |

|               |   |                            |
|---------------|---|----------------------------|
| <i>LPL</i>    | F | TACAGGGCGGCCACAAGTTT       |
|               | R | ATGGAGAGCAAAGCCCTGCTC      |
| <i>FABP4</i>  | F | CATCAGTGTGAATGGGGATG       |
|               | R | GTGGAAGTGACGCCTTTCAT       |
| <i>PPARG2</i> | F | GACCACTCCCACTCCTTGA        |
|               | R | CGACATTCAATTGCCATGAG       |
| <i>RUNX2</i>  | F | TATGAAAAACCAAGTAGCAAGGTTT  |
|               | R | GTAATCTGACTCTGTCCCTTGTGGAT |
| <i>BGLAP</i>  | F | GTGCAGAGTCCAGCAAAGGT       |
|               | R | CTAGCCAACCTCGTCACAGTC      |
| <i>ACAN</i>   | F | GCTACACCCTAAAGCCACTGCT     |
|               | R | CGTAGTGCTCCTCATGGTCATC     |
| <i>COL2</i>   | F | TTTCCCACCTCAAGATGGTC       |
|               | R | TCACCTGGTTTTCCACCTTC       |
| <i>COL10</i>  | F | GCCCAAGAGGTGCCCTGGAATAC    |
|               | R | CCTGAGAAAGAGGAGTGGACATAC   |
